# Supplementary material for: IR-Spectroscopic and X-ray-Structural Study of Vinyl-Type Carbocations in Their Carborane Salts
Source: PubMed Central journal article supplement — ACS Omega. 2022 Jul 29;7(31):27560–72. doi: 10.1021/acsomega.2c03025 (PMC9366973; doi:10.1021/acsomega.2c03025), 2022-07-29
Supplement: ao2c03025_si_001.pdf [file ao2c03025_si_001.pdf]

## SUPPORTING INFORMATION

**An IR-spectroscopic and X-ray-structural study of vinyl-type carbocations in their carborane salts**

*Evgenii S. Stoyanov,\* Irina Yu. Bagryanskaya and Irina V. Stoyanova*

N.N. Vorozhtsov Institute of Organic Chemistry, Siberian Branch of Russian Academy of Sciences, 9 Ak. Lavrentieva Avenue, Novosibirsk 630090, Russian Federation.

\* Corresponding author. E-mail address: [evgenii@nioch.nsc.ru](mailto:evgenii@nioch.nsc.ru)

## IR spectral data

**Table S1.**

The most indicative frequencies of the  $C_4H_8Cl^+$  cation in ATR IR spectra of its salts with anion  $\{F_{11}^-\}$  or  $\{Cl_{11}^-\}$

| Anion           | C-H stretch vibrations | H-C-H and C-C-H bent vibrations |      |      | vCC | $\nu_{as}C-Cl^+-C$ |
|-----------------|------------------------|---------------------------------|------|------|-----|--------------------|
| $\{F_{11}^-\}$  | 3079 2967 2929         | 1443                            | 1435 | *    | *   | 584                |
| $\{Cl_{11}^-\}$ | 3050 2985 2971 2945    | 1429                            | 1436 | 1252 | 883 | 582                |

\*Overlapped with strong absorption of the  $\{F_{11}^-\}$  anion.

**Table S2.**

The most characteristic frequencies of isomer **A** in its salts with the  $\{Cl_{11}^-\}$  anion in comparison with those of neutral 3-chloro-1-butene<sup>a</sup> (we do not show vibrations whose frequencies in IR spectra of the cations overlap with the intense absorption pattern of anion  $\{Cl_{11}^-\}$ )

| 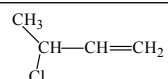 |  | Assignment <sup>a</sup>          |
|-------------------------------------------------------------------------------------|-------------------------------------------------------------------------------------|----------------------------------|
| solid                                                                               | <b>A</b>                                                                            | Approximate description          |
| 3084 s                                                                              | <i>b</i>                                                                            | =CH <sub>2</sub> asym stretch    |
| 3011 w                                                                              | <i>b</i>                                                                            | =CH stretch                      |
| 2986 s                                                                              | <i>b</i>                                                                            | =CH <sub>2</sub> sym stretch     |
| 2974 vs                                                                             | 2960                                                                                | CH <sub>3</sub> asym stretch     |
| 2927s                                                                               | 2928                                                                                | CH <sub>3</sub> sym stretch      |
| 2880                                                                                | 2872                                                                                | Combination                      |
| 1637 m                                                                              | 1680 s                                                                              | C=C stretch                      |
| 1446 s                                                                              | 1446                                                                                | CH <sub>3</sub> asym deformation |
| 1372 vs                                                                             | 1373                                                                                | CH <sub>3</sub> sym deformation  |
| 1307 w                                                                              | 1301                                                                                | CH bend                          |
|                                                                                     |                                                                                     | =CH <sub>2</sub> rock            |
| 1175s                                                                               | <i>c</i>                                                                            | CC stretch                       |
| 862s                                                                                |                                                                                     |                                  |
| 1096 m                                                                              | 1093 w                                                                              | CH <sub>3</sub> rock             |
| 708 s                                                                               | 770 s                                                                               | C-Cl stretch                     |

<sup>a</sup> Lee, M. J., Fusheng, F., Hur, S. W., Liu, J., Gounev, T. K., Durig, J. R. Raman and infrared spectra, conformational stability, normal coordinate analysis and ab initio calculations of 3-chloro-1-butene. J. Raman Spectrosc. 2000, 31, 157-169; <sup>b</sup> it is assumed that the protons of groups =CH<sub>2</sub> and =CH participate in fast proton exchange and do not yield narrow absorption bands in the IR spectra; <sup>c</sup> the frequencies of CC stretches of the cation differ significantly from those of a neutral molecule and were not identified with certainty

**Table S3.** The most characteristic frequencies of an IP in isomer **IV** of cation  $C_4H_7^+$  in its salt with the  $\{Cl_{11}^-\}$  anion in comparison with those of neutral compound 1-butene (we do not show cations' vibrations whose frequencies overlap with the intense absorption pattern of anion  $\{Cl_{11}^-\}$ )

| $\begin{array}{c} CH_3 \\   \\ CH_2-CH=CH_2 \end{array}$<br>cis / trans; gas <sup>a</sup> | $\begin{array}{c} CH_3 \\   \\ CH_2-C^+=CH_2 \end{array}$<br><b>IP of isomer IV</b> | Assignment <sup>a</sup><br>Approximate description |
|-------------------------------------------------------------------------------------------|-------------------------------------------------------------------------------------|----------------------------------------------------|
| 3090                                                                                      | 3112                                                                                | =CH <sub>2</sub> asym stretch                      |
| 3019                                                                                      | <i>b</i>                                                                            | =CH stretch                                        |
| 3008                                                                                      | 3056                                                                                | =CH <sub>2</sub> sym stretch                       |
| 2982 2978                                                                                 | 2850                                                                                | CH <sub>3</sub> asym stretch                       |
| 2952 2948                                                                                 | 2811                                                                                | CH <sub>3</sub> sym stretch                        |
| 2936                                                                                      | <i>b</i>                                                                            | CH <sub>2</sub> asym stretch                       |
| 2888                                                                                      | <i>b</i>                                                                            | CH <sub>2</sub> sym stretch                        |
| -                                                                                         | 2743                                                                                | Combination                                        |
| 1643 1647                                                                                 | 1588                                                                                | C=C stretch                                        |
| 1460 1463                                                                                 | 1460                                                                                | CH <sub>3</sub> asym deformation                   |
| 1450 1444                                                                                 | 1441                                                                                | CH <sub>2</sub> deformation                        |
| 1426 1421                                                                                 | 1412                                                                                | =CH <sub>2</sub> deformation                       |
| 1380                                                                                      | 1380                                                                                | CH <sub>3</sub> sym deformation                    |
| 1342 1318                                                                                 | <i>b</i>                                                                            | CH <sub>2</sub> wag                                |
| 1071 1079                                                                                 | 1076                                                                                | =CH <sub>2</sub> rock                              |
| 988 1020                                                                                  | <i>c</i>                                                                            | CC stretch                                         |
| 836 854                                                                                   |                                                                                     |                                                    |

<sup>a</sup> R. Durig, D. A. C. Compton. Spectroscopic and Thermodynamic Study of the Conformational Properties and Torsional Potential Functions of 1-Butene. *J. Phys. Chem.* 1980, 84, 773-781; *b* not determined; *c* the frequencies of CC stretches of the cation differ significantly from those of a neutral molecule and were not identified with certainty.

## Crystal phase data

**Table S4**

Crystallographic data and details of the XRD experiment

| Compound                                  | Salt of isomers <b>A/B</b>                                            | Salt of isomer <b>III</b>                                                                       | Salt of isomers <b>I/II</b>                                         |
|-------------------------------------------|-----------------------------------------------------------------------|-------------------------------------------------------------------------------------------------|---------------------------------------------------------------------|
| Empirical formula                         | C <sub>4</sub> H <sub>6</sub> Cl + CHB <sub>11</sub> Cl <sub>11</sub> | C <sub>4</sub> H <sub>7</sub> +C <sub>4</sub> H <sub>8</sub> +CHB <sub>11</sub> F <sub>11</sub> | C <sub>4</sub> H <sub>7</sub> + CH B <sub>11</sub> Cl <sub>11</sub> |
| Formula weight                            | 611.42                                                                | 452.13                                                                                          | 576.97                                                              |
| Temperature K                             | 200(2)                                                                | 200(2)                                                                                          | 200(2)                                                              |
| Wavelength Å                              | 0.71073                                                               | 0.71073                                                                                         | 0.71073                                                             |
| Crystal system                            | Orthorhombic                                                          | Monoclinic                                                                                      | Monoclinic                                                          |
| Space group                               | Pnma                                                                  | P2 <sub>1</sub> /c                                                                              | P2 <sub>1</sub>                                                     |
| Unit cell dimensions <i>a</i> Å           | 14.7756(8)                                                            | 8.252(3)                                                                                        | 9.241(3)                                                            |
| <i>b</i> Å                                | 11.9476(7)                                                            | 11.928(4)                                                                                       | 13.060(4)                                                           |
| <i>c</i> Å                                | 12.6233(8)                                                            | 9.977(4)                                                                                        | 10.830(4)                                                           |
| $\alpha$ °                                | 90                                                                    | 90                                                                                              | 90                                                                  |
| $\beta$ °                                 | 90                                                                    | 105.841(11)                                                                                     | 102.475(12)                                                         |
| $\gamma$ °                                | 90                                                                    | 90                                                                                              | 90                                                                  |
| Volume Å <sup>3</sup>                     | 2228.4(2)                                                             | 944.7(6)                                                                                        | 1276.2(7)                                                           |
| <i>Z</i>                                  | 2                                                                     | 2                                                                                               | 2                                                                   |
| Density (calcd.) Mg.m <sup>-3</sup>       | 1.822                                                                 | 1.589                                                                                           | 1.501                                                               |
| Abs. coefficient mm <sup>-1</sup>         | 1.485                                                                 | 0.159                                                                                           | 1.190                                                               |
| F(000)                                    | 1184                                                                  | 448                                                                                             | 560                                                                 |
| Crystal size mm <sup>3</sup>              | 0.1 x 0.15 x 0.2                                                      | 0.10 x 0.20 x 0.30                                                                              | 0.08 x 0.15 x 0.20                                                  |
| $\Theta$ range for data collection °      | 2.1 – 26.0                                                            | 2.6 - 25.1                                                                                      | 2.3 – 26.1                                                          |
| Index ranges                              | -18 ≤ <i>h</i> ≤ 18, -14 ≤ <i>k</i> ≤ 14, -15 ≤ <i>l</i> ≤ 15         | -9 ≤ <i>h</i> ≤ 9, -14 ≤ <i>k</i> ≤ 14, -11 ≤ <i>l</i> ≤ 11                                     | -10 ≤ <i>h</i> ≤ 11, -16 ≤ <i>k</i> ≤ 16, -13 ≤ <i>l</i> ≤ 13       |
| Reflections collected                     | 37223                                                                 | 11028                                                                                           | 12368                                                               |
| Independent reflections                   | 2300 R(int) = 0.049                                                   | 1680 R(int) = 0.068                                                                             | 5024 R(int) = 0.056                                                 |
| Completeness to $\theta$ %                | 99.8                                                                  | 99.1                                                                                            | 99.4                                                                |
| Data / restraints / parameters            | 2300 / 111 / 199                                                      | 1680 / 56 / 172                                                                                 | 5024/ 182 / 275                                                     |
| Goodness-of-fit for <i>F</i> <sup>2</sup> | 1.16                                                                  | 1.04                                                                                            | 1.07                                                                |

|                                               |                                |                                  |                                  |
|-----------------------------------------------|--------------------------------|----------------------------------|----------------------------------|
| Final R indices $I > 2\sigma(I)$              | $R_1=0.0626$ , $wR_2 = 0.1635$ | $R_1 = 0.1537$ , $wR_2 = 0.3426$ | $R_1 = 0.0736$ , $wR_2 = 0.1995$ |
| Final R indices (all data)                    | $R_1=0.0739$ , $wR_2 = 0.1697$ | $R_1=0.2256$ , $wR_2 = 0.3860$   | $R_1=0.0975$ , $wR_2 = 0.2178$   |
| Largest diff. peak / hole $e.\text{\AA}^{-3}$ | 1.23 / -0.81                   | 0.70 / -0.56                     | 2.5 / -0.63                      |

**Table S5.** Selected bond lengths and bond angles for isomers **A** and **B** of cation  $C_4H_7Cl^+$  in the salt with the  $CHB_{11}Cl_{11}^-$  counterion

| Isomer <b>A</b> |                         | Isomer <b>B</b> |                         |
|-----------------|-------------------------|-----------------|-------------------------|
| Bond            | Length ( $\text{\AA}$ ) | Bond            | Length ( $\text{\AA}$ ) |
| C1K1–C3K1       | 1.33(2)                 | C1K2–C3K2       | 1.50(2)                 |
| C3K1–C4K1       | 1.50(3)                 | C3K2–C4K2       | 1.33(3)                 |
| C4K1–C11K       | 1.96(3)                 | C4K2–C12K       | 1.75(3)                 |
| C4K1–C2K1       | 1.52(3)                 | C4K2–C2K2       | 1.51(3)                 |
| Bond angles     | ( $^\circ$ )            | Bond angles     | ( $^\circ$ )            |
| C1K1–C3K1–C4K1  | 140(2)                  | C1K2–C3K2–C4K2  | 125(2)                  |
| C3K1–C4K1–C2K1  | 143(3)                  | C3K2–C4K2–C2K2  | 148(2)                  |

**Table S6.** Selected bond lengths and bond angles for isomers **I**, **IIa** and **IIb** of cation  $C_4H_7^+$  in the salt with the  $CHB_{11}Cl_{11}^-$  counterion

| Isomer <b>IIa</b> |                         | Isomer <b>IIb</b> |                         | Isomer <b>I</b> |                         |
|-------------------|-------------------------|-------------------|-------------------------|-----------------|-------------------------|
| Bond              | Length ( $\text{\AA}$ ) | Bond              | Length ( $\text{\AA}$ ) | Bond            | Length ( $\text{\AA}$ ) |
| C1–C2             | 1.47(5)                 | C3'–C4            | 1.30(3)                 | C2''–C3''       | 1.39(3)                 |
| C2–C3             | 1.39(3)                 | C3'–C8'           | 1.55(2)                 | C2''–C6         | 1.51(4)                 |
| C3–C4             | 1.55(2)                 | C4–C7             | 1.47(4)                 | C3''–C8''       | 1.55(2)                 |
| Bond angles       | ( $^\circ$ )            | Bond angles       | ( $^\circ$ )            | Bond angles     | ( $^\circ$ )            |
| C1–C2–C3          | 129(2)                  | C4–C3'–C8'        | 126(2)                  | C3''–C2''–C6    | 107(2)                  |
| C2–C3–C4          | 120(2)                  | C3'–C4–C7         | 130(2)                  | C2''–C3''–C8''  | 120(2)                  |

**Table S7.** Selected bond lengths and bond angles for isomer **III** of cation  $C_4H_7^+$  and a 2-butene molecule in the salt with the  $CHB_{11}F_{11}^-$  counterion

| Isomer <b>III</b> |                         | 2-butene    |                         |
|-------------------|-------------------------|-------------|-------------------------|
| Bond              | Length ( $\text{\AA}$ ) | Bond        | Length ( $\text{\AA}$ ) |
| C1–C2             | 1.51(3)                 | C1'–C2'     | 1.50(3)                 |
| C2–C3             | 1.34(2)                 | C2'–C3'     | 1.35(4)                 |
| C3–C4             | 1.51(3)                 | C3'–C4'     | 1.51(3)                 |
| Bond angles       | ( $^\circ$ )            | Bond angles | ( $^\circ$ )            |
| C1–C2–C3          | 107(2)                  | C1'–C2'–C3' | 112(2)                  |
| C2–C3–C4          | 126(2)                  | C2'–C3'–C4' | 122(1)                  |
